# Supplementary material
Source: PubMed Central journal article supplement (PMC7206897)
Supplement: NIHMS1058556-supplement-Supplemental_Table_1.pdf [file NIHMS1058556-supplement-Supplemental_Table_1.pdf]

## Supplementary Table 1. Hi-C Read and Filtering Statistics

| Cell Type and Replica Number |    | Total Reads | Reads After Filtering | Cis Reads >10kb |
|------------------------------|----|-------------|-----------------------|-----------------|
| Rods                         | R1 | 156,913,060 | 18,030,234            | 5,105,041       |
|                              | R2 | 152,605,824 | 25,944,021            | 6,349,206       |
| Non-rod Neurons              | R1 | 116,252,619 | 19,226,557            | 5,650,359       |
|                              | R2 | 146,003,208 | 40,646,198            | 15,748,047      |
| LBR-null Thymocytes          | R1 | 156,172,508 | 51,945,401            | 23,387,464      |
|                              | R2 | 142,846,173 | 44,963,418            | 18,715,738      |
| WT Thymocytes                | R1 | 144,508,673 | 44,190,905            | 28,022,538      |
|                              | R2 | 151,520,833 | 50,278,218            | 31,134,393      |

### Primary Tissue Hi-C for Comparison<sup>2</sup>

| Cell Type and Replica Number | Total Reads | Reads After Filtering | Cis Reads >10kb |
|------------------------------|-------------|-----------------------|-----------------|
| Bladder, R1                  | 233,041,838 | 52,456,550            | 24,121,444      |
| Bladder, R2                  | 236,250,557 | 43,395,294            | 19,659,511      |
| Adrenal Gland, R1            | 181,680,303 | 48,951,415            | 22,449,886      |
| Psoas Muscle, R1             | 196,863,028 | 36,856,215            | 13,566,008      |
| Psoas Muscle, R2             | 95,110,351  | 25,776,091            | 10,410,829      |
| Pancreas, R1                 | 160,416,883 | 49,627,891            | 21,200,091      |
| Pancreas, R2                 | 12,147,138  | 3,538,979             | 1,367,214       |
| Pancreas, R3                 | 128,745,528 | 15,683,831            | 7,787,867       |
| Lung, R1                     | 308,335,703 | 85,597,004            | 24,417,652      |
| Hippocampus, R1              | 187,658,680 | 64,151,770            | 29,220,961      |

|                                    |             |             |            |
|------------------------------------|-------------|-------------|------------|
| Right Ventricle, R1                | 672,319,838 | 179,219,920 | 63,091,486 |
| Small Bowel, R1                    | 177,864,628 | 58,017,249  | 21,073,296 |
| Spleen, R1                         | 378,529,216 | 107,599,392 | 33,032,593 |
| Ovary, R1                          | 201,215,217 | 70,283,904  | 20,909,766 |
| Dorsolateral Prefrontal Cortex, R1 | 165,728,687 | 52,713,868  | 25,426,433 |
