# Supplementary material
Source: PubMed Central journal article supplement (PMC7206897)
Supplement: NIHMS1058556-supplement-Supplemental_Table_2.pdf [file NIHMS1058556-supplement-Supplemental_Table_2.pdf]

## Supplementary Table 2. List of BACs used in this study.

| chromosome | BAC # | compartment (in rods) | full BAC name | BAC coordinates according to GRCm38/mm9 assembly |
|------------|-------|-----------------------|---------------|--------------------------------------------------|
|------------|-------|-----------------------|---------------|--------------------------------------------------|

BACs for tracing chromosomal loci and chromatin compaction estimation during differentiation retinal cell

|       |   |        |             |                              |
|-------|---|--------|-------------|------------------------------|
| chr 1 | 1 | B      | RP23-301J4  | chr1:148,427,249-148,630,696 |
|       | 2 | B      | RP24-218I23 | chr1:149,531,820-149,662,189 |
|       | 3 | B      | RP24-287C18 | chr1:150,513,860-150,698,942 |
|       | 4 | B      | RP23-149H6  | chr1:150,812,163-151,003,321 |
|       | 5 | weak A | RP23-215H3  | chr1:151,664,650-151,861,157 |
|       | 6 | A      | RP24-318A10 | chr1:152,971,124-153,121,132 |
|       | 7 | A      | RP23-184H2  | chr1:153,525,078-153,731,791 |
|       | 8 | A      | RP23-20L20  | chr1:154,487,105-154,694,524 |

|       |    |        |             |                              |
|-------|----|--------|-------------|------------------------------|
| chr 2 | 9  | A      | RP24-134B13 | chr2:93,736,040-93,907,764   |
|       | 10 | A      | RP23-214A16 | chr2:94,088,207-94,276,965   |
|       | 11 | B      | RP23-421B15 | chr2:97,663,720-97,847,295   |
|       | 12 | weak B | RP23-340I3  | chr2:101,017,004-101,218,085 |
|       | 13 | A      | RP24-367D17 | chr2:101,903,896-102,048,200 |

|       |    |     |             |                          |
|-------|----|-----|-------------|--------------------------|
| chr 6 | 14 | --- | RP23-120L10 | chr6:3,025,850-3,271,476 |
|       | 15 | --- | RP23-20F16  | chr6:3,414,712-3,614,619 |
|       | 16 | A   | RP23-317H22 | chr6:3,856,716-4,085,483 |
|       | 17 | A   | RP23-288L22 | chr6:4,525,064-4,696,692 |

BACs for labeling constitutive A and B compartment loci of chromosome 11

|        |    |   |            |                               |
|--------|----|---|------------|-------------------------------|
| chr 11 | 18 | B | RP23-57E21 | chr11:14,107,822-14,360,877   |
|        | 19 | B | RP23-33F12 | chr11:25,104,302-25,315,399   |
|        | 20 | B | RP23-263I7 | chr11:47,527,023-47,730,951   |
|        | 21 | A | RP23-399H5 | chr11:78,274,464-78,467,177   |
|        | 22 | A | RP24-73A8  | chr11:97,942,676-98,185,208   |
|        | 23 | A | RP23-82I5  | chr11:120,199,525-120,428,921 |

BACs for labeling *Rho* locus

|       |    |        |             |                              |
|-------|----|--------|-------------|------------------------------|
| chr 6 | 24 | A      | RP23-116F20 | chr6:113,263,811-113,485,267 |
|       | 25 | A      | RP23-111F16 | chr6:114,002,262-114,189,099 |
|       | 26 | A      | RP23-86F18  | chr6:114,901,511-115,120,641 |
|       | 27 | A      | RP23-219M6  | chr6:115,737,278-115,942,756 |
|       | 28 | weak B | RP23-62L5   | chr6:116,810,598-116,936,147 |
